# Supplementary material
Source: Research Square preprint supplement (doi:10.21203/rs.3.rs-9350424/v1)
Supplement: Supplementary file 1 [file 6d9a885d1bdb909f50fe0241.xlsx]

## Sheet: Sheet1
Table 2. Treatment Regimens
	Low	Med	High	p value
Clinical trial at 1st line	142/1215 (12%)	168/1189 (14%)	148/1234 (12%)	0.15
Clinical trial at 2nd line	77/474 (16%)	79/532 (15%)	90/514 (18%)	0.51
1ST line therapy regimen				0.012
PI only	559/1348 (42%)	647/1334 (49%)	634/1358 (47%)	0
IMiD only	185/1348 (14%)	160/1334 (12%)	160/1358 (12%)	0
PI+IMiD	527/1348 (39%)	448/1334 (34%)	482/1358 (36%)	0
Other	77/1348 (6%)	79/1334 (6%)	82/1358 (6%)	0
Best clinical response to chemotherapy				0.63
CR	144/1018 (14%)	160/1023 (16%)	175/1099 (16%)	0
VGPR	334/1018 (33%)	336/1023 (33%)	357/1099 (33%)	0
PR	402/1018 (40%)	386/1023 (38%)	420/1099 (38%)	0
MR	66/1018 (6%)	81/1023 (8%)	89/1099 (8%)	0
SD	47/1018 (5%)	35/1023 (3%)	33/1099 (3%)	0
PD	25/1018 (2%)	25/1023 (2%)	25/1099 (2%)	0
Year commenced induction, median (IQR)	2021 (2018, 2023)	2018 (2018, 2022)	2020 (2018, 2022)	<0.001
ASCT	511/1099 (47%)	585/1154 (51%)	596/1127 (53%)	0.009
Time from commencement of induction to ASCT (months), median (IQR)	5.5 (4.7, 6.6)	5.3 (4.6, 6.4)	5.2 (4.4, 6.1)	<0.001
