# Supplementary material
Source: Research Square preprint supplement (doi:10.21203/rs.3.rs-9350424/v1)
Supplement: Supplementary file 2 [file ab1e37a14bfdb9dda7c6bacc.xlsx]

## Sheet: Sheet1
Table 1. Baseline Demographics
	Low	Med	High	p value
N	1484	1463	1458
Age (years), median (IQR)	68.6 (61.0, 75.8)	67.3 (59.1, 75.3)	68.7 (60.8, 76.1)	0.01
Age Category (years)				0.04
<60	335/1484 (23%)	406/1463 (28%)	340/1458 (23%)
60-70	499/1484 (34%)	460/1463 (31%)	474/1458 (33%)
70-80	435/1484 (29%)	396/1463 (27%)	435/1458 (30%)
80+	215/1484 (14%)	201/1463 (14%)	209/1458 (14%)
Year of diagnosis	2021 (2018, 2023)	2020 (2018, 2022)	2020 (2018, 2022)	<0.001
Gender				0.71
Male	914/1484 (62%)	882/1463 (60%)	898/1458 (62%)
Female	570/1484 (38%)	581/1463 (40%)	560/1458 (38%)
Ethnicity				0.031
European	441/555 (79%)	545/640 (85%)	576/692 (83%)
Asian	114/555 (21%)	95/640 (15%)	116/692 (17%)
Remoteness				<0.001
Major cities	629/1484 (42%)	968/1463 (66%)	1348/1458 (92%)
Inner regional	493/1484 (33%)	382/1463 (26%)	106/1458 (7%)
More remote	362/1484 (24%)	113/1463 (8%)	4/1458 (0%) (0%)
BMI, median (IQR)	28.2 (25.1, 32.3)	27.5 (24.2, 31.2)	26.2 (23.3, 29.6)	<0.001
ISS Stage 3	307/1070 (29%)	295/1007 (29%)	300/1083 (28%)	0.72
ECOG > 1	196/1033 (19%)	156/897 (17%)	123/862 (14%)	0.024
Diabetes	211/1324 (16%)	166/1254 (13%)	125/1220 (10%)	<0.001
Liver disease	18/1324 (1%)	18/1254 (1%)	13/1220 (1%)	0.69
Cardiac disease	181/1324 (14%)	135/1254 (11%)	130/1220 (11%)	0.026
Pulmonary disease	94/1324 (7%)	61/1254 (5%)	47/1220 (4%)	<0.001
Peripheral neuropathy	34/1324 (3%)	37/1254 (3%)	30/1220 (2%)	0.73
