# Supplementary material
Source: Research Square preprint supplement (doi:10.21203/rs.3.rs-9350424/v1)
Supplement: Supplementary file 3 [file bd5bbf567a85a0cb317f8c7e.xlsx]

## Sheet: Sheet1
Table 3. Demographics of ASCT versus no ASCT in patients <70 years
	No ASCT	ASCT	p-value
N	448	1554
Age (years), median (IQR)	64.4 (58.3, 68.0)	60.6 (53.6, 65.3)	<0.001
AgeCat			<0.001
<60	134/448 (30%)	738/1554 (48%)
60-70	314/448 (70%)	816/1554 (53%)
Gender			0.96
Male	275/448 (61%)	952/1554 (61%)
Female	173/448 (39%)	602/1554 (39%)
Ethnicity			0.54
European	150/180 (83%)	594/730 (81%)
Asian	30/180 (17%)	136/730 (19%)
Remoteness			0.85
Major cities	304/448 (68%)	1061/1554 (68%)
Inner regional	97/448 (22%)	320/1554 (21%)
More remote	47/448 (10%)	173/1554 (11%)
BMI, median (IQR)	27.8 (24.0, 32.6)	27.4 (24.4, 31.1)	0.16
ISS Stage 3	107/330 (32%)	220/1161 (19%)	<0.001
ECOG > 1	64/289 (22%)	99/1032 (10%)	<0.001
Diabetes	79/386 (20%)	118/1329 (9%)	<0.001
Liver disease	11/386 (3%)	20/1329 (2%)	0.081
Cardiac disease	56/386 (15%)	75/1329 (6%)	<0.001
Pulmonary disease	33/386 (9%)	33/1329 (2%)	<0.001
Peripheral neuropathy	23/386 (6%)	29/1329 (2%)	<0.001
IRSAD score, median (IQR)	1000 (946, 1054)	1016 (959, 1078)	<0.001
IRSAD group			0.002
Low	168/448 (38%)	478/1554 (31%)
Med	163/448 (36%)	541/1554 (35%)
High	117/448 (26%)	535/1554 (34%)
